# Supplementary material for: A facile self-template and carbonization strategy to fabricate nickel nanoparticle supporting N-doped carbon microtubes
Source: Royal Society of Chemistry journal article supplement (doi:10.1039/c8qi00039e), 2018-01-01
Supplement: c8qi00039e1.pdf [file c8qi00039e1.pdf]

## **A facile self-template and carbonization strategy to fabricate nickel nanoparticles supported N-doped carbon microtubes**

Jianping Wang<sup>a</sup>, Min Zhang<sup>a\*</sup>, Teng Miao<sup>a</sup>, Yang Ling<sup>a</sup>, Qiong Wen<sup>a</sup>, Jing Zheng<sup>a\*</sup>, Jingli Xu<sup>a</sup>,  
Tasawar Hayat<sup>b</sup>, Njud S. Alharbi<sup>c</sup>

College of Chemistry and Chemical Engineering, Shanghai University of Engineering Science,  
Shanghai 201620, PR China Email: [zhangmin@sues.edu.cn](mailto:zhangmin@sues.edu.cn); [kkzhengjing707@163.com](mailto:kkzhengjing707@163.com).

### **Supporting information**

#### **Synthesis of PPy@PDA and NCMTs-900**

50 mg of MoO<sub>3</sub>@PPy composites were uniformly dispersed in a mixture solution of 25 mL absolute ethanol and 15 mL deionized H<sub>2</sub>O by ultrasonication. Then, 5 mL of ammonia aqueous solution was added and stirring for 5 min. After that, 45 mg of dopamine was added into the above solution stirring for 16 h at room temperature. Subsequently, the product was collected by centrifugation and washed with deionized water and ethanol several times and dried at 60°C. Lastly, the obtained PPy@PDA was burned in a tube furnace under an N<sub>2</sub> atmosphere at 900°C for 5 h to obtain the NCMTs-900.

#### **Synthesis of NGCMTs-900**

Ni/NCMTs-900 was dissolved into 20% HNO<sub>3</sub> and shaken 24 h to etch nickel NPs. After acid treatment, NGCMTs-900 was collected.

#### **Catalytic activity of NGCMTs-900**

Typically, 5 mg NaBH<sub>4</sub> was mixed with the freshly prepared 4-Nitrophenol aqueous solution (0.1 mM, 3 mL). Afterwards, NGCMTs-900 (1 mg) was added into the reaction mixture. The reaction process was monitored by UV-vis spectroscopy.

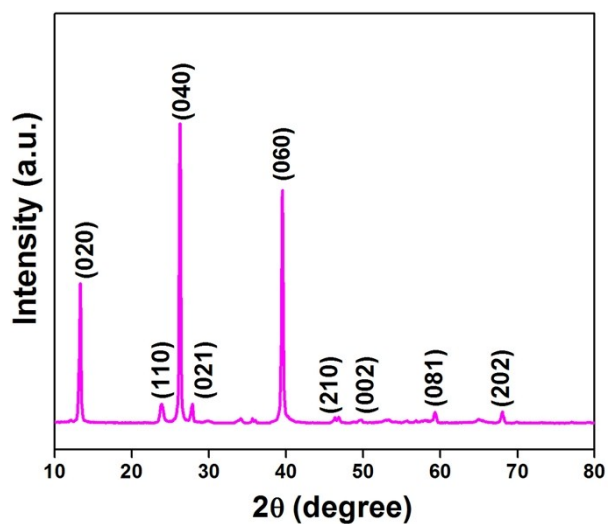

Fig. S1. XRD pattern of MoO<sub>3</sub> microrods.

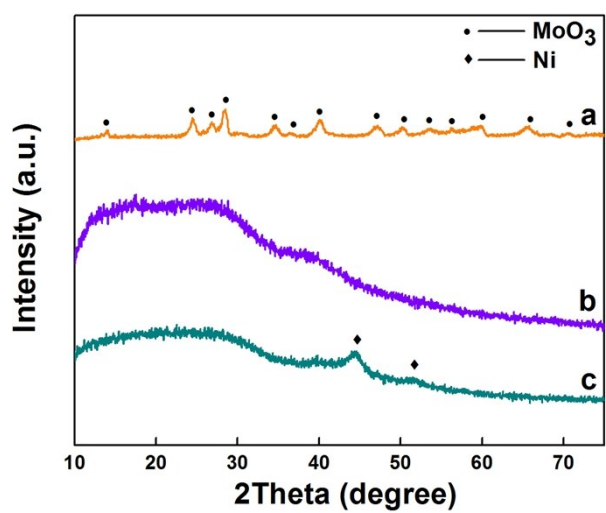

Fig. S2. XRD patterns of MoO<sub>3</sub>@PPy (a), PPy@PDA-Ni<sup>2+</sup> (b) and Ni/NCMTs-500 (c).

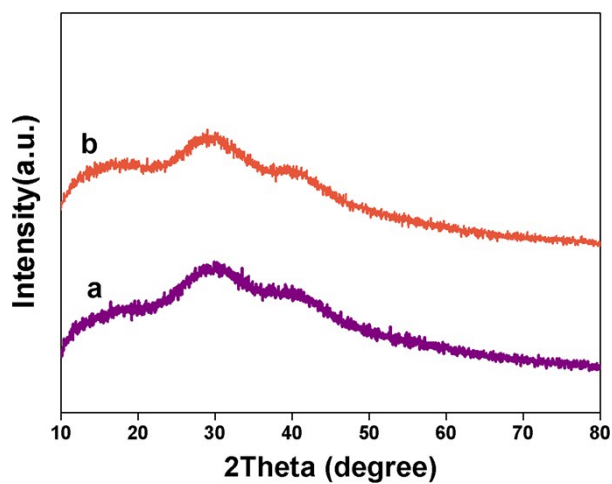

Fig. S3. XRD patterns of PPy@PDA-Ni<sup>2+</sup> synthesizing at 0.5 mL ammonia (a) and 2 mL ammonia (b).

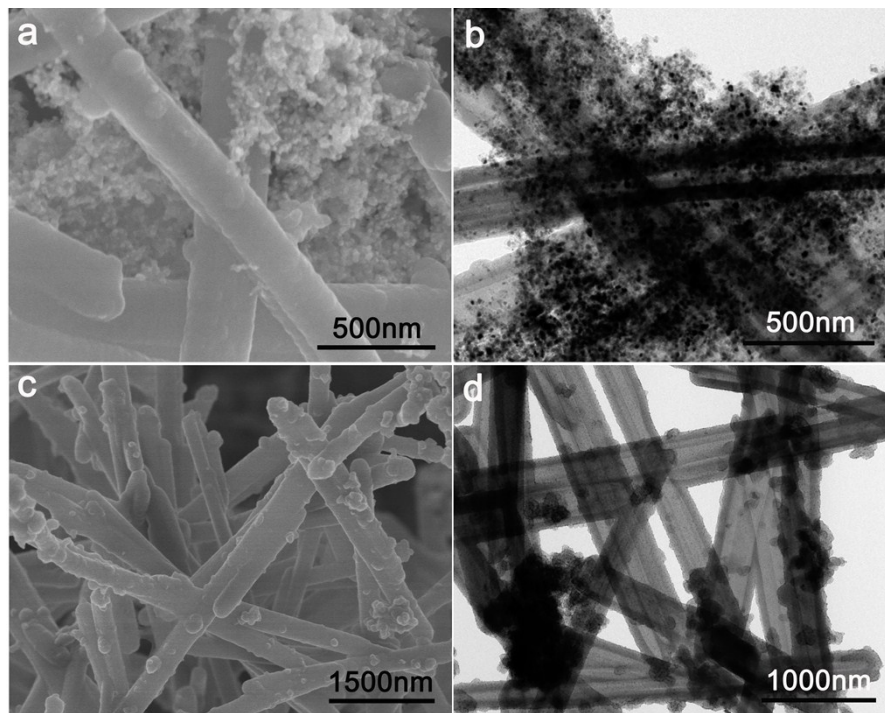

Fig. S4 SEM and TEM images of Ni/NCMTs-0.5 (a, b) and Ni/NCMTs-2 (c, d).

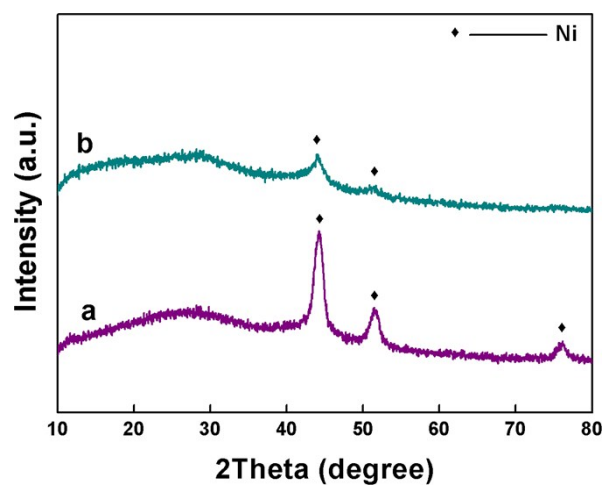

Fig. S5 XRD pattern of Ni/NCMTs-0.5 (a) and Ni/NCMTs-2 (b).

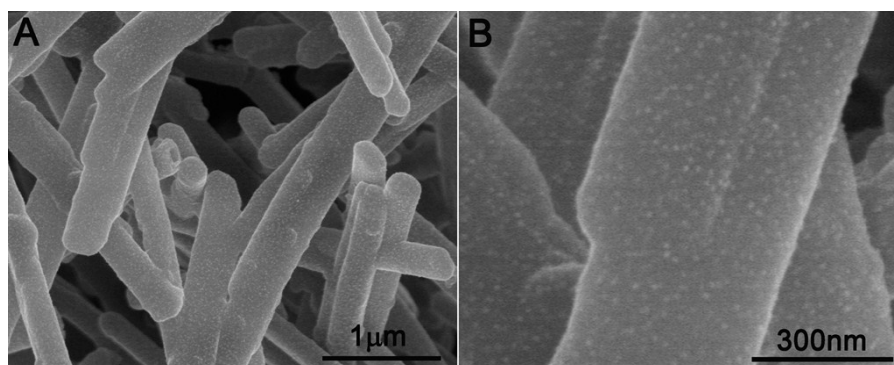

Fig. S6 SEM and TEM image of PPy@RF-Ni<sup>2+</sup> (a) and carbonized product (b).

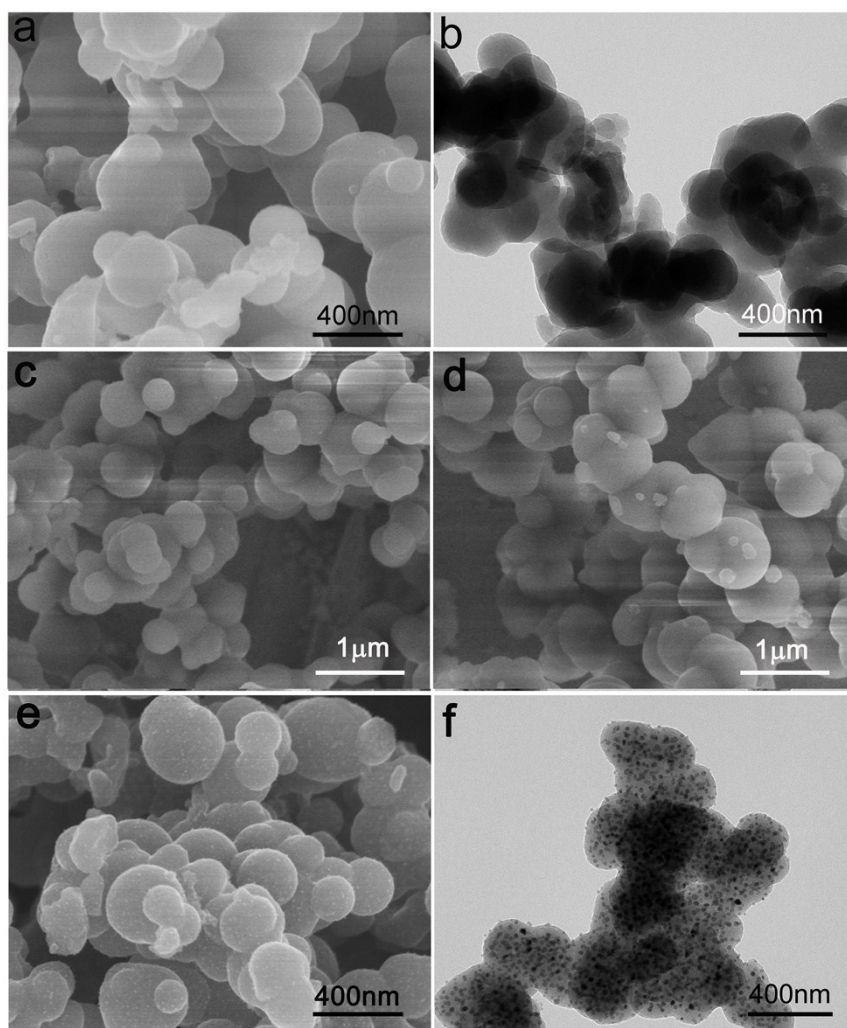

**Fig. S7** SEM and TEM images of PDA-Ni<sup>2+</sup> (a, b) prepared at 2 mL ammonia, SEM and TEM images of carbonized product (e, f); SEM images of PDA-Ni<sup>2+</sup> prepared at 0.5 mL (c) and 5 mL (d) ammonia.

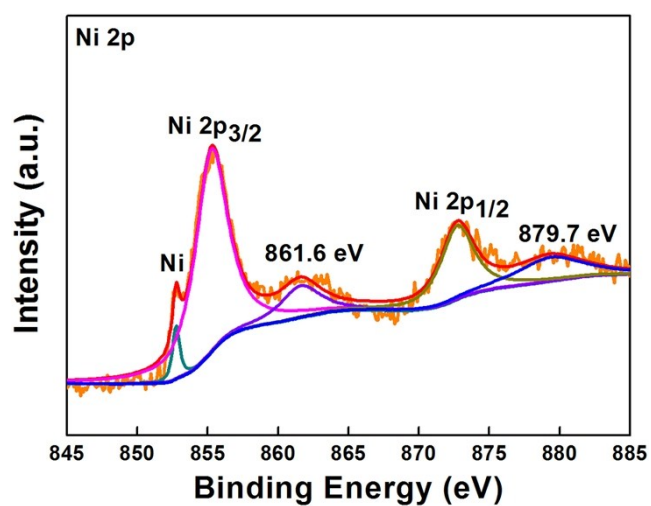

**Fig.S8** Deconvoluted XPS spectra of Ni 2p monitored in Ni/NCMTs-500.

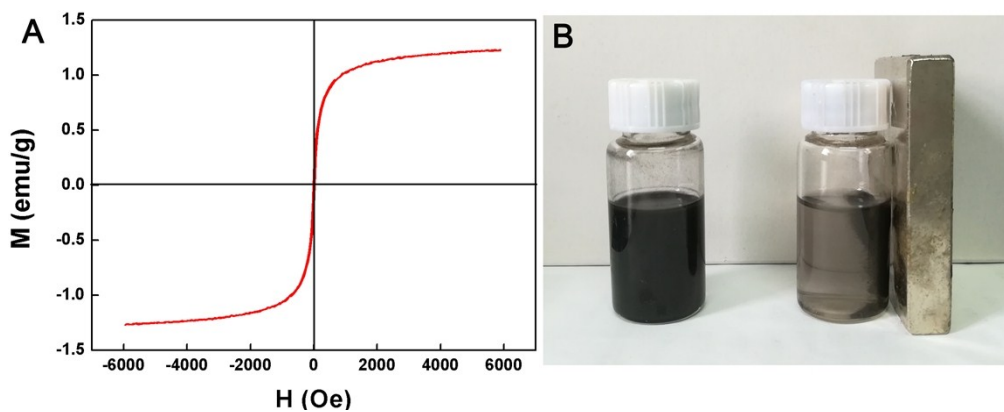

Fig.S9 Magnetic hysteresis curves of Ni/NCMTs-500.

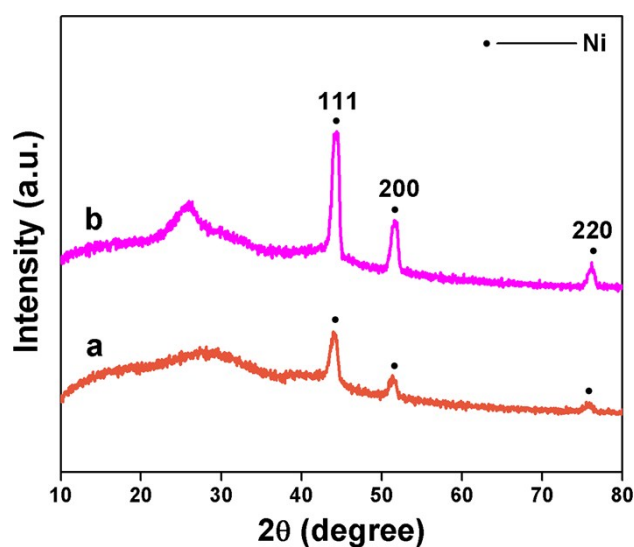

Fig. S10 X-Ray diffraction patterns of Ni/NCMTs-700 (a) and Ni/NCMTs-900 (b).

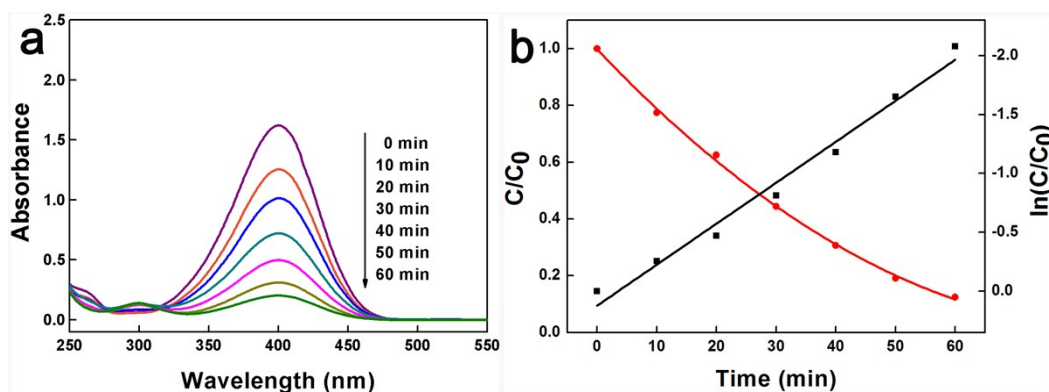

Fig.S11 (a) UV-vis spectra of NGCMTs-900 catalyzed 4-NP to 4-AP after 60 minutes; (b)  $C/C_0$  and  $\ln(C/C_0)$  versus time for the reduction of 4-NP over 1.0 mg NGCMTs-900 catalysts, the ratio of 4-NP concentration ( $C_t$  at time  $t$ ) to its initial value  $C_0$  is directly represented by the relative intensity of the respective absorption peak at 400 nm.

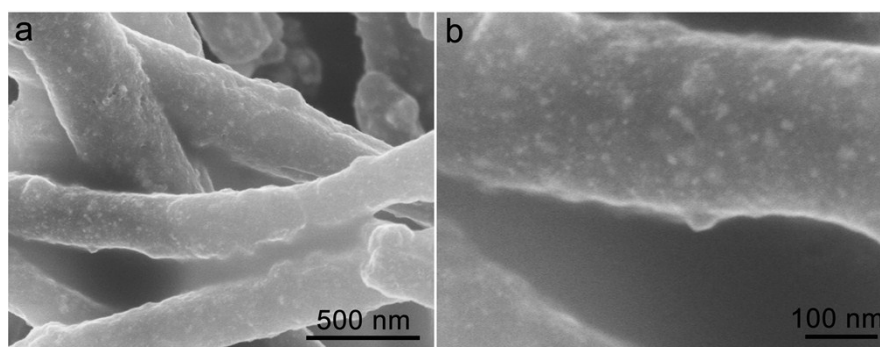

Figure 2. SEM images of Ni/NCMTs-500 for the reduction of 4-nitrophenol after recycled 5 times.

**Table.S1** ICP data of different samples and comparison for the reduction of 4-NP.

| Samples      | Ni content ( $\mu\text{g}/\text{mg}$ ) | $K (\times 10^{-3} \text{s}^{-1})$ | $\kappa (\text{mg}^{-1} \text{s}^{-1})$ |
|--------------|----------------------------------------|------------------------------------|-----------------------------------------|
| Ni/NCMTs-500 | 41.0                                   | 5.7                                | 0.139                                   |
| Ni/NCMTs-700 | 122                                    | 8.7                                | 0.071                                   |
| Ni/NCMTs-900 | 131                                    | 4.2                                | 0.032                                   |

**Table.S2** Comparison of the reduction of 4-NP with different catalysts.

| Samples           | Type           | $k(\times 10^{-3} \text{s}^{-1})$ | $\kappa(\times 10^{-3} \text{mg}^{-1} \text{s}^{-1})$ | References |
|-------------------|----------------|-----------------------------------|-------------------------------------------------------|------------|
| Ni/NCMTs-500      | Micro-nanotube | 5.7                               | 139                                                   | This work  |
| Ni/NCMTs-700      | Micro-nanotube | 8.7                               | 71                                                    | This work  |
| Ni/NCMTs-900      | Micro-nanotube | 4.2                               | 32                                                    | This work  |
| Ni/SNTs(23.0 wt%) | Nanotube       | 84                                | 91                                                    | 1          |
| Ni/SNTs(23.0 wt%) | Nanotube       | 84                                | 91                                                    | 1          |
| Ni/p (AMPS)       | Hydrogel       | 0.9                               | 0.15                                                  | 2          |
| Ni/MC-550         | Nanotube       | 1.51                              | 338                                                   | 3          |
| Ni/MC-750         | Nanotube       | 6.26                              | 5640                                                  | 3          |
| Ni/MC-950         | Nanotube       | 2.40                              | 2424                                                  | 3          |
| RGO-Ni            | Nanosheets     | 0.25                              | 0.04                                                  | 4          |

1. S. Zhang, S. Gai, F. He, S. Ding, L. Li and P. Yang, *Nanoscale*, 2014, **6**, 11181-11188.
2. N. Sahiner, H. Ozay, O. Ozay and N. Aktas, *Applied Catalysis A: General*, 2010, **385**, 201-207.
3. Y. Yang, Y. Ren, C. Sun and S. Hao, *Green Chemistry*, 2014, **16**, 2273-2280.
4. Z. Ji, X. Shen, G. Zhu, H. Zhou and A. Yuan, *Journal of Materials Chemistry*, 2012, **22**, 3471-3477.
